# Supplementary material
Source: PubMed Central journal article supplement (PMC2174716)
Supplement: plntcell_tpc.107.052373_1.pdf [file plntcell_tpc.107.052373_1.pdf]

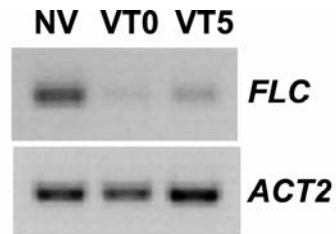

**Supplementary Figure 1.** *FLC* Repression in *ldl1 fld* by Vernalization.

'NV' sample from nonvernalized seedlings grown at 22°C, 'VT0' sample from seedlings vernalized for 8 weeks and 'VT5' sample from seedlings vernalized for 8 weeks and subsequently grown for 5 days at 22°C.

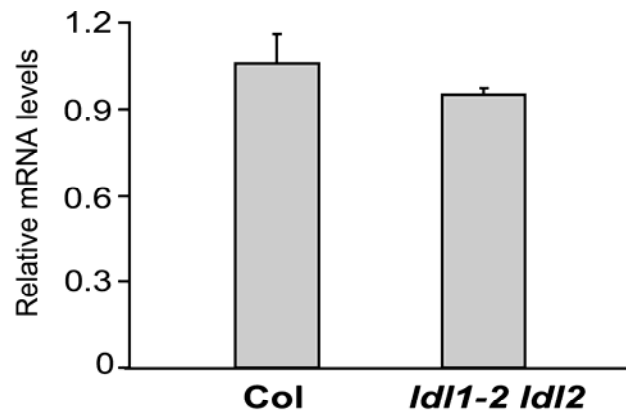

**Supplementary Figure 2.** Relative *FLM* mRNA Levels in Col and *Id1 Id12* Seedlings Quantified by Real-Time PCR. The values shown are means ± standard deviation.

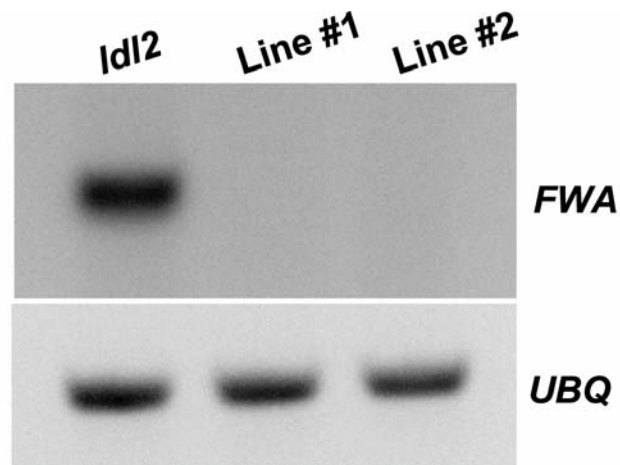

**Supplementary Figure 3.** Complementation of the *Idl2* Mutation. A wild-type copy of genomic *LDL2* was introduced into *Idl2* mutants via *Agrobacterium tumefaciens*-mediated transformation; levels of *FWA* transcripts in two independent homozygous T3 lines were examined; *UBQ* served as a control.

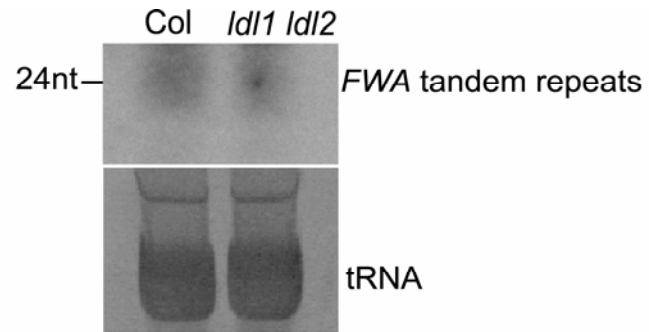

**Supplementary Figure 4.** *FWA* siRNAs in Col and *Id1 Id2* Analyzed by Northern Blotting. tRNA stained by ethidium bromide serves as a loading control.

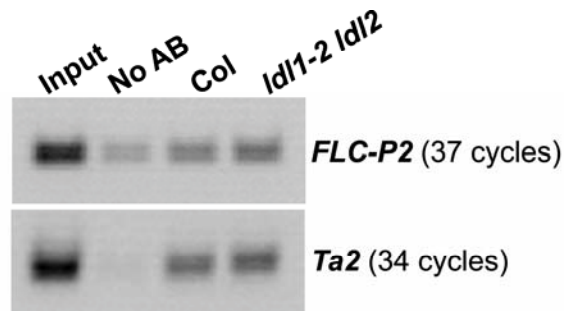

**Supplementary Figure 5.** State of Histone H3K9me2 in Col and *Idl1 Idl2* Seedlings Examined by ChIP-PCR. The input is Col chromatin before immunoprecipitation (diluted 600 times); 'No AB' refers to the mock sample (Col chromatin) lacking of anti-dimethyl-Histone H3 (Lys 9); the numbers of PCR cycles are in parentheses. The amount of genomic *FLC* in Col sample is slightly higher than that in the mock sample and is at a similar level to that in *Idl1 Idl2*, whereas genomic *Ta2* (a heterochromatic locus) was readily detected.

**Supplementary Table 1.** Sequences of Primers Used in Experiments of RT-PCR and ChIP-PCR.

| Experiments        | Amplification regions              | Sequences                                                                       |
|--------------------|------------------------------------|---------------------------------------------------------------------------------|
| RT-PCR             | <i>FLC</i>                         | Forward:<br>CCGAACTCATGTTGAAGCTTGTGAG<br>Reverse: CGGAGATTTGTCCAGCAGGTG         |
|                    | <i>FLM</i>                         | Forward: CGCTGTTGTCGTCGTATCTGC<br>Reverse: CAGTCTCAAGTTGTTCCCTCCAGAG            |
|                    | <i>FWA</i>                         | Forward: CGACGCTGCAGAGACACTGC<br>Reverse: AGTTGAGAGTCATCGCTGTGCT                |
|                    | <i>ACTIN2</i>                      | Forward:<br>CTCATCTTCTCCGCTCTTTCTTTCCAAG<br>Reverse:<br>CACCATCACCAGAATCCAGCACA |
|                    | <i>LDL2</i>                        | Forward: CATAcAGTCTCTGGTGGCCCTG<br>Reverse:<br>GACCCATATGACAAAGGATCACTTCC       |
| ChIP-PCR           | <i>FLC-P1</i>                      | Forward:<br>TGTCCACACATATGGCAATAGCTCAA<br>Reverse: CAAGCTGATACAAGCATTTCACCAA    |
|                    | <i>FLC-P2</i>                      | Forward: CCTAATTTGATCCTCAGGTTTGGG<br>Reverse:<br>CCGACGAAGAAAAAGTAGATAGGCAC     |
|                    | <i>TUB2</i>                        | Forward: ATCCGTGAAGAGTACCCAGAT<br>Reverse: AAGAACCATGCACTCATCAGC                |
|                    | <i>P-1 (FWA)</i>                   | TaqMan MGB probe: ATGCAGCTGATGTGCCTT                                            |
|                    | <i>P-2 (FWA)</i>                   | TaqMan MGB probe: CACAACACACAACATTC                                             |
|                    | <i>TDRs (FWA)</i>                  | TaqMan MGB probe: CCGTCGAGAATCTCA                                               |
| <i>CDS-1 (FWA)</i> | TaqMan MGB probe: AACCGCATCCAAATCA |                                                                                 |
| <i>CDS-2 (FWA)</i> | TaqMan MGB probe: AAGCCTCCACAATTTG |                                                                                 |
